# Supplementary material for: A specialized ODE integrator for the efficient computation of parameter sensitivities
Source: Springer Nature journal article supplement (doi:10.1186/1752-0509-6-46), 2012-05-20

A

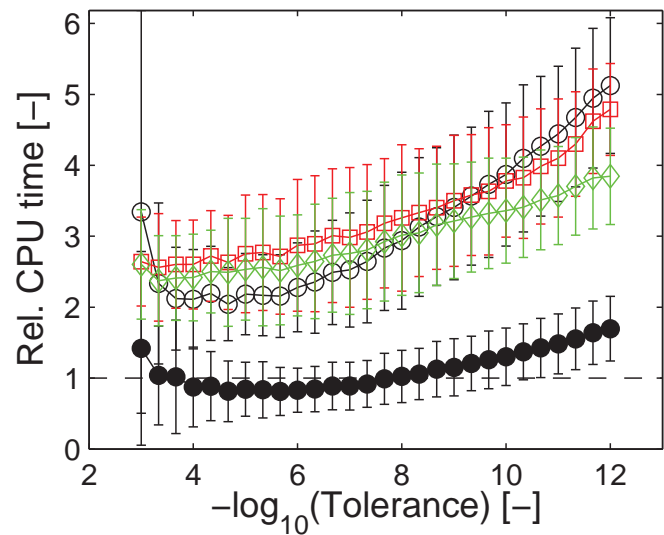

B

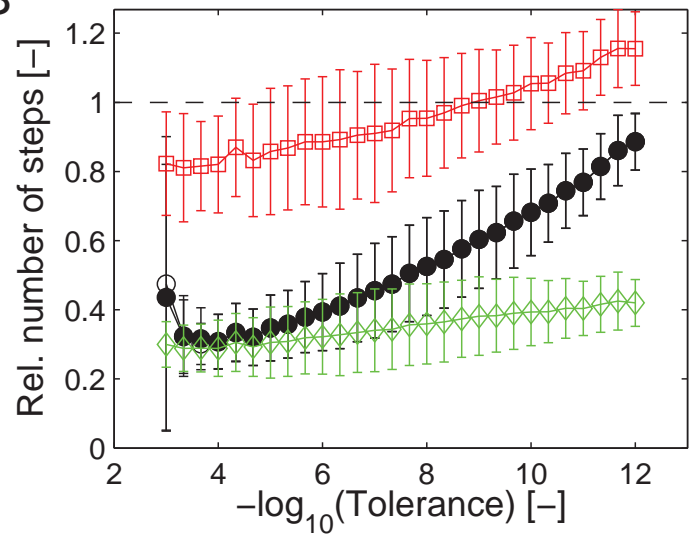

C

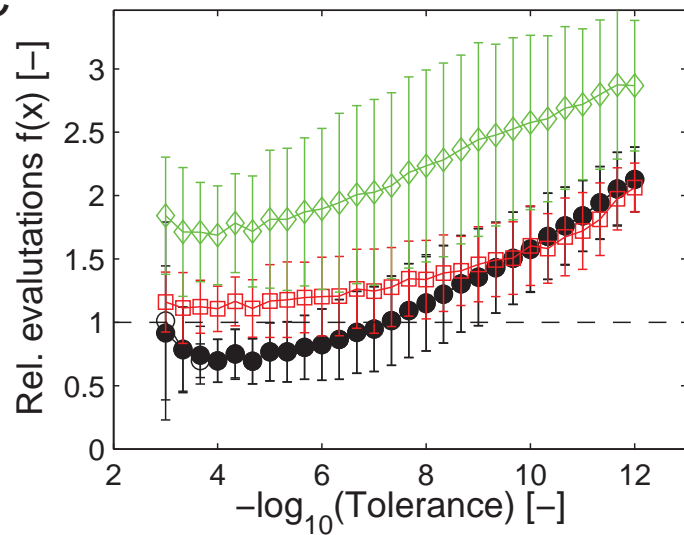

D

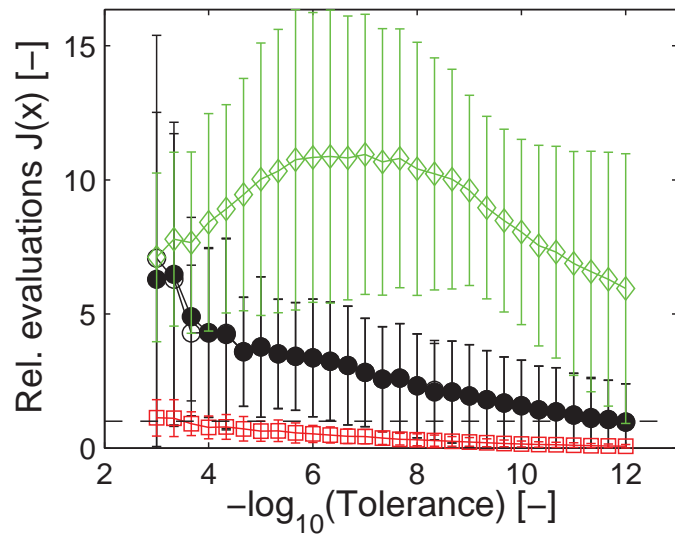

E

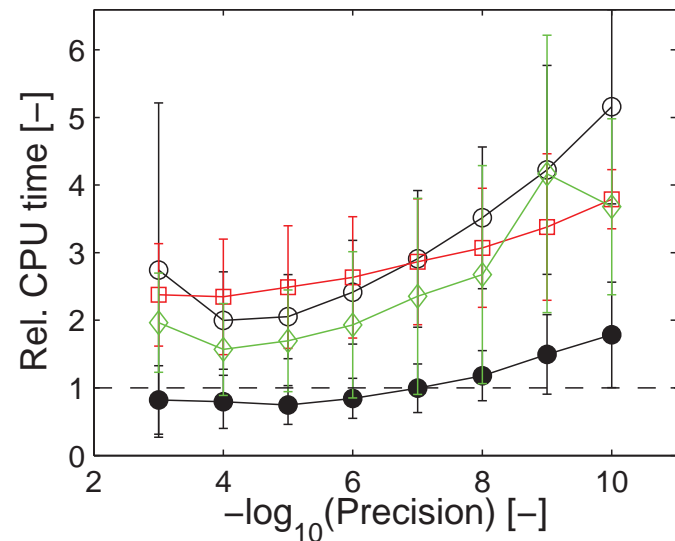

F

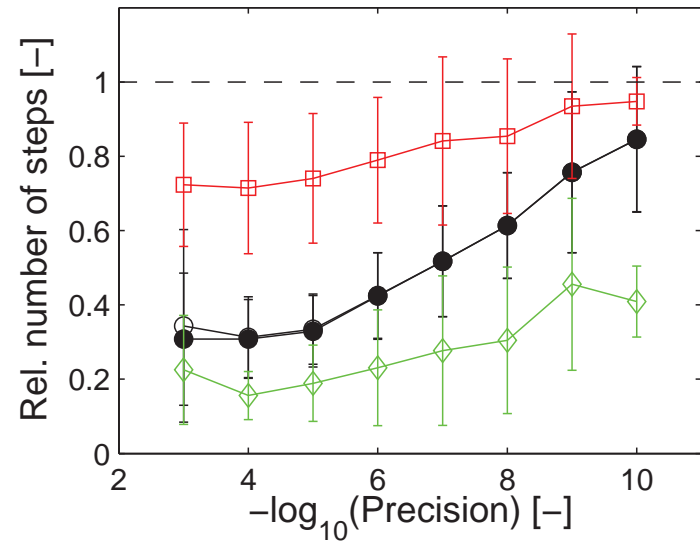

Supplement: 12918_2011_986_MOESM3_ESM.pdf [file 12918_2011_986_MOESM3_ESM.pdf]
